# Supplementary material
Source: Elsevier journal article supplement (https://www.sciencedirect.com/science/article/pii/S0325754120300626)
Supplement: mmc1 [file S0325754120300626:mmc1.xlsx]

## Sheet: Hoja1
Table S1. Percentage of correct answers for testing event from 1996 to 2018.
% Correct answers	Result	Level of complexity	Testing event	Type of specimen*	Category**
95	Candida albicans	1	1, 7, 14, 20, 25, 36	CS	FY
89	Epidermophyton floccosum	1	9, 24, 30, 39	CS	D
86	Trichophyton mentagrophytes / T. interdigitale	1	5, 11, 19, 27, 32, 37, 43	CS	D
84	Nanizzia gypsea ( formerly Microsporum gypseum)	1	3, 6, 17, 23, 33, 38	CS	D
81	Microsporum canis	1	12,18, 26, 31, 35, 42	CS	D
79	Trichophyton rubrum	1	3, 15, 28, 34, 40	CS	D
72	Trichophyton tonsurans	1	11, 21, 29	CS	D
92	Aspergillus niger	2	2, 8, 22	CS	A
83	Cryptococcus neoformans	2	3, 17, 32, 36	CS	FY
78	Candida tropicalis	2	7, 12, 19, 27, 31, 38	CS	FY
77	Aspergillus fumigatus	2	6, 13, 16, 26	CS	A
75	Pichia kudriavzevii (formerly Candida krusei, Issatchenkia orientalis)	2	1, 8, 15, 22, 29, 35, 40	CS	FY
74	Candida glabrata	2	9, 13, 18, 24, 30, 33, 39	CS	FY
73	Candida parapsilosis	2	20, 23, 28, 34, 41	CS	FY
96	Fusarium solani	3	9, 24	CS	HY
95	Mucor hiemalis	3	16, 27	CS	MUC
92	Penicillium citrinum	3	33	CS	HY
90	Sporothrix schenckii	3	14, 22	CS	HY
89	Scedosporium apiospermum	3	21	CS	HY
88	Aspergillus terreus	3	20, 36	CS	HY
87	Exophiala dermatitidis	3	35	CS	DEM
84	Phialophora verrucosa	3	10, 28	CS	DEM
84	Sarocladium kiliense (formerly Acremonium kiliense)	3	19, 29	CS	HY
83	Rhizopus arrhizus ( formerly R. oryzae)	3	8, 23, 34	CS	MUC
83	Curvularia lunata	3	30	CS	DEM
79	Malassezia sympodialis	3	11	CS	UY
79	Syncephalastrum racemosum	3	32, 40	CS	MUC
78	Rhizopus microsporus	3	42	CS	MUC
72	Fonsecaea monophora	3	39	CS	DEM
59	Lichtheimia corymbifera	3	4,17,37	CS	MUC
55	Paecilomyces variotii	3	31	CS	HY
52	Alternaria alternata	3	5	CS	DEM
44	Scedosporium boydii	3	41	CS	HY
33	Wickerhamomyces anomalus (formerly Pichia anomala)	3	4	CS	UY
29	Purpureocillium lilacinum	3	38	CS	HY
28	Cryptococcus gattii	3	42	CS	UY
13	Candida haemulonii	3	26	CS	UY
98	Malassezia furfur	1	5	PS	DS
94	Cryptococcus neoformans	2	4, 16, 25	PS	DO
86	Paracoccidioides brasiliensis	3	14, 18, 25	PS	DE
83	Yeast	2	19	PS	DO
71	Coccidioides immitis spherules	3	10	PS	DE
68	Dermatophytes	1	1	PS	DS
61	Septate hyaline hyphae	2	7	PS	DO
57	Coenocytic hyphae	2	21	PS	DO
100	Positive for Aspergillus	3	2	FA	S
96	Positive for Coccidioides immitis	3	10, 19, 23, 39	FA	S
93	Positive for Paracoccidiodes brasiliensis	3	6, 22, 29, 31, 36, 38	FA	S
91	Positive for Aspergillus fumigatus	3	25, 34, 42	FA	S
91	Negative	3	2, 5, 6, 12, 20, 26, 28, 35	FA	S
90	Positive for Aspergillus niger	3	27, 37, 43	FA	S
84	Positive for Histoplasma capsulatum	3	15, 21, 24, 33, 40	FA	S
60	Positive for Aspergillus flavus	3	18, 30, 41	FA	S
Footnote: *Type of specimen: CS: Collection strain, FA: Fungal antisera, PS: Patient specimen or Simulated clinical sample. **Category: FY: Frequently isolated yeast, D: Dermatophyte, A: Aspergillus fumigatus or A. niger, UY: Unfrequently isolated yeast, MUC: Order Mucorales, DEM: Dematiaceous fungi, HY: Hialine hyphomycete, DS: direct microscopic examination of superficial mycoses, DO: direct mi…
